# Supplementary material for: Every atom counts: predicting sites of reaction based on chemistry within two bonds
Source: Royal Society of Chemistry journal article supplement (doi:10.1039/d4dd00092g), 2024-01-01
Supplement: d4dd00092g1.pdf [file d4dd00092g1.pdf]

Supporting Information

**Every atom counts: Predicting sites of reaction based on chemistry within two bonds**

Ching Ching Lam<sup>1</sup> and Jonathan M. Goodman<sup>1\*</sup>

1. Yusuf Hamied Department of Chemistry, University of Cambridge, Lensfield Road, Cambridge, CB2 1EW  
\*jmg11@cam.ac.uk

## Table of Contents

|                                                                 |           |
|-----------------------------------------------------------------|-----------|
| <b>1. DATASET AND SCRIPTS</b> .....                             | <b>3</b>  |
| 1.1 DATA .....                                                  | 3         |
| 1.2 SCRIPTS.....                                                | 6         |
| 1.3 ATOM-TO-ATOM MAPPING .....                                  | 11        |
| <b>2. BOND STRENGTH DESCRIPTORS</b> .....                       | <b>12</b> |
| <b>3. MODEL EVALUATION</b> .....                                | <b>15</b> |
| <b>4. PERFORMANCE ON NON-ELEMENTARY REACTION EXAMPLES</b> ..... | <b>24</b> |
| <b>5. REFERENCE</b> .....                                       | <b>25</b> |

# 1. Dataset and Scripts

## 1.1 Data

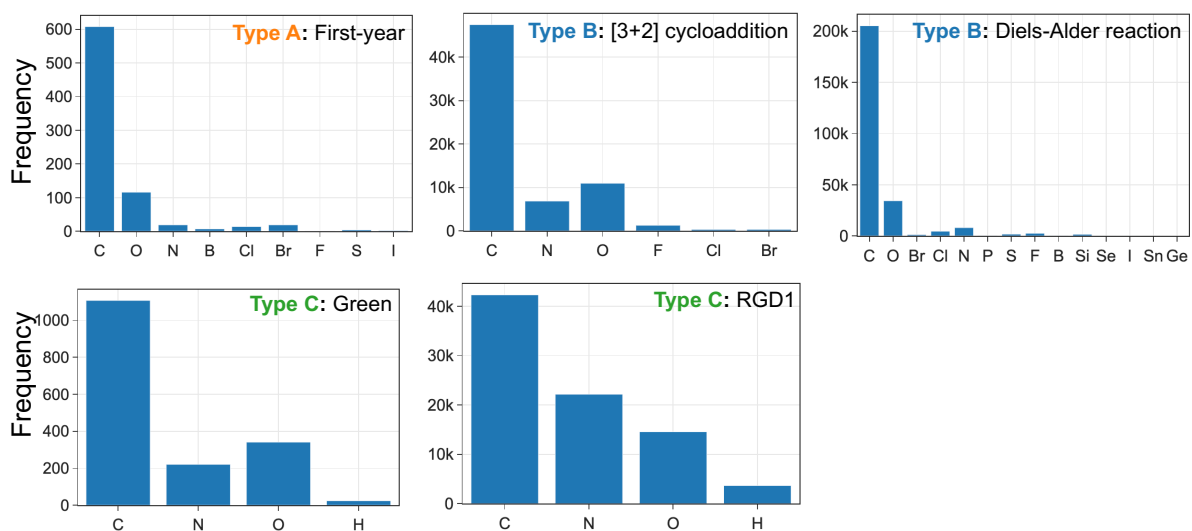

**Figure S1.** An overview of the reactants in each dataset. The bar charts summarize the nature of the non-hydrogen atoms in the molecules.

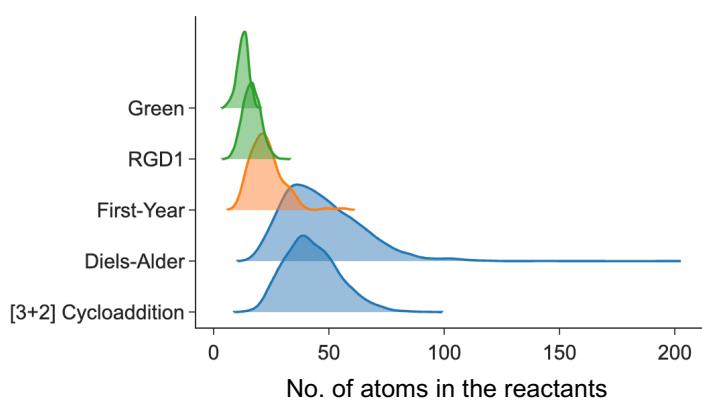

**Figure S2.** The distribution of the size of the chemical systems in each dataset.

**Table S1.** Numerical records on filtering reactions

| Dataset                                 | Number of filtered reactions | Number of reactions before filtering | Number of reactions after filtering |
|-----------------------------------------|------------------------------|--------------------------------------|-------------------------------------|
| First-year                              | 0                            | 147                                  | 147                                 |
| [3+2] cycloaddition                     | 21                           | 5974                                 | 5953                                |
| Diels-Alder                             | 263                          | 11274                                | 11011                               |
| RGD1 (EA < 40 kcal mol <sup>-1</sup> )  | 125                          | 11406                                | 11281                               |
| Green (EA < 40 kcal mol <sup>-1</sup> ) | 11                           | 332                                  | 321                                 |
| RGD1 (EA < 60 kcal mol <sup>-1</sup> )  | 517                          | 28038                                | 27521                               |
| Green (EA < 60 kcal mol <sup>-1</sup> ) | 37                           | 1049                                 | 1012                                |

**Source of errors:****1. 3D structure error:**

Unable to be processed by RDKit to generate 3D structure at the force field level with the default setting, *ie* return errors when encountering the following functions –

```
AllChem.EmbedMolecule(mol,randomSeed=0xf00d)
AllChem.MMFFOptimizeMolecule(mol)
mol.GetConformer()
```

**2. Re-indexing error:**

Atom-to-atom mapping needs to be carried out between the competitive pathways, reactions with the same reactants but different products. This ensures consistent atom indexing across the competitive pathways, which is important for generating labels in preparation for model training.

The atom-to-atom mapping across competitive pathways was done via mol1.GetSubstructMatch(mol2) function from RDKit. mol1 and mol2 are RDKit Chem.Mol objects generated from reactant SMILES strings that contain atom indexing. mol1.GetSubstructMatch(mol2) returns the indices of atoms in mol1 that match with mol2.

Reactions with the same reactants were grouped together via conversion to InChI string. Inevitably, reactions with tautomer structures with difference connectivity as reactants were grouped together, such as the example below:

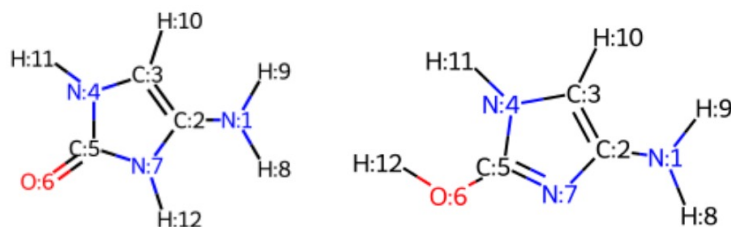

InChI=1S/C3H5N3O/c4-2-1-5-3(7)6-2/h1H,4H2,(H2,5,6,7)

**Figure S3.** Tautomer structures with difference connectivity share the same InChI string.

The mol1.GetSubstructMatch(mol2) function was unable to match resonance structures with different connectivity. This led to the re-indexing error.

### 3. Placeholder atom error:

The reaction SMILES string contains placeholder atoms, '\*'.

### 4. Hypervalent error:

The reaction involved hypervalent molecule.

#### A breakdown on the filtered reactions:

**[3+2] cycloaddition:** 21 reactions were filtered due to 3D structure errors.

**Diels-Alder:** 7 reactions contain hypervalent molecules. 8 reactions involve re-indexing errors during the atom-to-atom mapping for competitive pathways. 22 reactions contain placeholder atoms. 226 reactions were filtered due to 3D structure errors.

**RGD1 (EA < 40 kcal mol<sup>-1</sup>):** 63 reactions were filtered due to 3D structure errors. 62 reactions encounter re-indexing errors during the atom-to-atom mapping for competitive pathways.

**RGD1 (EA < 60 kcal mol<sup>-1</sup>):** 89 reactions were filtered due to 3D structure errors. 428 reactions encounter re-indexing errors during the atom-to-atom mapping for competitive pathways.

**Green (EA < 40 kcal mol<sup>-1</sup>):** 11 reactions were filtered due to 3D structure errors.

**Green (EA < 60 kcal mol<sup>-1</sup>):** 33 reactions were filtered due to 3D structure errors. 4 reactions encounter re-indexing errors during the atom-to-atom mapping for competitive pathways.

#### Combined dataset

The overlaps between the datasets with the 'chk\_dup\_v2.py' script via converting the reactant and product into InChI strings. The test shows that there are overlaps between the RGD1 and Green dataset (EA cut-off < 40 kcal mol<sup>-1</sup>). Three reactions (idx in RGD1 dataset = 1308, 6573, 6574) in the RGD1 dataset also appear in the Green dataset. One reaction (idx in RGD1 dataset = 11190) from the RGD1 dataset is a competitive pathway, the same reactants but different products, to reactions in the Green dataset. These reactions were removed from the RGD1 dataset prior to selecting reactions of the combined dataset.

## 1.2 Scripts

GitHub repository **TwoBondChem/**

<https://github.com/Goodman-lab/TwoBondChem>

### A. Directory tree of the TwoBondChem/

```
TwoBondChem/
├── bond_strength_descriptor/
│   ├── bond_pre_classifier_v2.py
│   └── bondlength_fromsmi_v2.py
├── data_processing/
│   ├── competitive_pathway_atom_mapping.py
│   ├── initial_treatment.py
│   └── remove_emb_error.py
├── dataset/
│   ├── cyclo_data_v2_16072024.csv
│   ├── da_08012024_vCorr.csv
│   ├── diels_alder_data_v7_19052024.csv
│   ├── exam_test.csv
│   ├── exam_test_28122023.csv
│   ├── fav_RGD1_13012024_v2.csv
│   ├── first-year_data_all_27122023.csv
│   ├── green_04012024.csv
│   ├── green_ea60_c_23052024.csv
│   └── rgd_ea60_c_23052024.csv
├── model_evaluation/
│   ├── chk_dup_v3.py
│   ├── evaluation.py
│   ├── random_sample_test.py
│   ├── random_sample_test_all.py
│   ├── random_sample_test_Bmix.py
│   ├── random_sample_test_Cmix.py
│   ├── save_model.py
│   ├── save_model2.py
│   ├── take_one_out_test.py
│   └── train_size_test.py
├── model_test_2.ipynb
├── React.py
├── README.md
├── RF_model_yr1_28122023.sav
├── scripts/
│   ├── atidx.py
│   ├── bond_classification_01112022.csv
│   ├── get_descriptors_v2.py
│   ├── get_label_v4.py
│   ├── model_training_v3.py
│   └── training_prepare_v5.py
├── cyclo_2b+/
│   ├── cyclo_0_13012024_label.csv
│   ├── cyclo_1_13012024_label.csv
│   ├── cyclo_2_13012024_label.csv
│   ├── cyclo_3_13012024_label.csv
│   ├── cyclo_4_13012024_label.csv
│   ├── cyclo_5_13012024_label.csv
│   ├── cyclo_6_13012024_label.csv
│   └── cyclo_7_13012024_label.csv
```

```
| | | cyclo_8_13012024_label.csv
| | | cyclo_9_13012024_label.csv
| | random_sample_test_EXAMPLE.py
| | evaluate_EXAMPLE.ipynb
```

\*Archive files have not been included

## B. Environment

The scripts in this project are written in Python under the following environment:

- The Python (3.8.12) Standard Library
- Pandas (1.1.5)
- Numpy (1.19.2)
- Sklearn (0.24.2/1.0.1)
- RDkit (2021.9.4)
- Scipy (1.4.1)
- Rxnmapper (0.1.4)

## C. Data

### **dataset/ folder:**

All the datasets (Type A: the first-year reactions + three reactions from Part 1A exam at the University of Cambridge; Type B: [3+2] cycloaddition<sup>1</sup> and Diels-Alder reaction dataset;<sup>2</sup> Type C: the Reaction Graph Depth 1 (RGD1))<sup>3</sup> and the Green dataset)<sup>4</sup> are available in the dataset/ folder as csv files. The reaction data is processed and formatted in the same style for the purpose of this investigation. The atom-to-atom mapping numbering in the reaction SMILES is consistent for competitive pathways with the same reactants. There are three columns in each csv file:

- idx: index of the reaction
- code: reactions with the same code are competitive pathways (*ie* having the same reactants)
- reaction: mapped reaction SMILES

The RGD1 dataset csv file also has an 'Rind' column, which corresponds to the index in the 'reaction' column in the original datafile:

[https://figshare.com/articles/dataset/model\\_reaction\\_database/21066901?file=40272727](https://figshare.com/articles/dataset/model_reaction_database/21066901?file=40272727) (accessed Feb 5<sup>th</sup>, 2024).

'da\_08012024\_vCorr.csv' contains 100 Diels-Alder reactions, where the atom-to-atom mapping errors have been picked out and corrected manually.<sup>5</sup> Before the correction, reactions with index = 2, 30, 31, 49, 66, 70, 88 and 99 contain errors.

Three out of 147 reactions in the first-year reaction dataset ('first-year\_data\_all\_27122023.csv') had mapping errors, which were subsequently corrected manually. Before the correction, reactions with index = 50, 74 and 124 contain errors. Reactions with a code greater than 77 belong to the testing data set.

We filtered and processed the RGD1 and the Green datasets to ensure that the reactions are thermodynamically favourable (*ie*  $\Delta H_r < 0$  kcal mol<sup>-1</sup>) with a low kinetic barrier (*ie* activation energy, EA < 40 kcal mol<sup>-1</sup>). This gives the 'fav\_RGD1\_13012024\_v2.csv' and 'green\_04012024.csv'. To study the

effect of varying the EA cut-off, we also filtered and processed the RGD1 and the Green datasets with an EA cut-off of 60 kcal mol and  $\Delta H_r < 0$  kcal mol<sup>-1</sup> – ‘rgd\_ea60\_c\_23052024.csv’ and ‘green\_ea60\_c\_23052024.csv’.

data\_processing/competitive\_pathway\_atom\_mapping.py input and output example files:  
‘exam\_test.csv’ and ‘exam\_test\_28122023.csv’



## D. Scripts

**React\_v2.py**: code for using the random forest model

**model\_test\_3.ipynb**: Jupyter notebook on how to use the 'React.py' script

### Saved models:

**Table S2.** Saved models in the GitHub

| File                        | Note                                                                                                                                                                                                                                                                       |
|-----------------------------|----------------------------------------------------------------------------------------------------------------------------------------------------------------------------------------------------------------------------------------------------------------------------|
| RF_model_yr1_28122023.sav   | RF model trained from all reactions in the first-year dataset                                                                                                                                                                                                              |
| RF_model_cyclo_11062024.sav | RF model trained from the first 100 reactions in the [3+2] cycloaddition dataset                                                                                                                                                                                           |
| RF_model_da_11062024.sav    | RF model trained from the first 100 reactions in the Diels-Alder dataset                                                                                                                                                                                                   |
| RF_model_green_11062024.sav | RF model trained from the first 100 reactions in the Green dataset                                                                                                                                                                                                         |
| RF_model_rgd_11062024.sav   | RF model trained from the first 300 reactions in RGD1 dataset                                                                                                                                                                                                              |
| RF_model_Bmix_11062024.sav  | RF model trained from 100 sets of randomly selected [3+2] cycloaddition reactions and 100 sets of randomly selected Diels-Alder reactions.                                                                                                                                 |
| RF_model_Cmix_11062024.sav  | RF model trained from 100 sets of randomly selected Green reactions and 100 sets of randomly selected RGD1 reactions.                                                                                                                                                      |
| RF_model_all_11062024.sav   | RF model trained from 78 sets of first-year reactions, 100 sets of [3+2] cycloaddition reactions, 100 sets of Diels-Alder reactions, 100 sets of Green reactions and 100 sets of RGD1 reactions. All reactions were randomly selected from the corresponding full dataset. |

### scripts/ folder:

**atidx.py**: contains the functions for conducting atom-to-atom mapping and formatting the reaction SMILES strings for competitive pathways

**get\_descriptors\_v2.py**: contains functions for generating the atomistic descriptor components

- Associated file: '**bond\_classification\_01112022.csv**' – the parameters for generating the bond strength descriptors

**get\_label\_v4.py**: contains functions for generating the atomistic label

**training\_prepare\_v5.py**: compiles functions in 'get\_descriptors\_v2.py' and 'get\_label\_v4.py' to generate the descriptor arrays and labels for atoms in a set of reactants

**model\_training\_v3.py**: functions for training and evaluating the model

### data\_processing/ folder:

**initial\_treatment.py**: group reactions with the same reactants together vis InChI strings; for the Diels-Alder dataset only, reactions with placeholder atoms are also removed. Reactions with hypervalent molecules lead to errors in the model training and testing. They are removed manually from the Diels-Alder dataset.

**remove\_emb\_error.py**: filter reactions with 3D structure errors

**competitive\_pathway\_atom\_mapping.py:** This script executes the functions in atidx.py to conduct atom-to-atom mapping of individual reactions and between the competitive pathways. This process was conducted only on the first-year and Diels-Alder datasets.

- Associated files in the dataset/ folder: 'exam\_test.csv' and 'exam\_test\_28122023.csv' – the input and output csv file from executing the script are provided for illustrations

#### **bond strength descriptor/ folder:**

**bondlength\_fromsmi\_v2.py:** gather bond length data from SMILES strings

**bond\_pre\_classifier\_v2.py:** using the bond length data to generate bond strength descriptor classification criteria, *ie* the 'bond\_classification\_01112022.csv' file

#### **model evaluation/ folder:**

All the scripts under the model\_evaluation/ should be moved from TwoBondChem/model\_evaluation/ to TwoBondChem/ before execution.

**chk\_dup\_v3.py:** check if there are overlaps between datasets

**random\_sample\_test.py, random\_sample\_test\_all.py, random\_sample\_test\_Bmix.py, random\_sample\_test\_Cmix.py:** scripts for carrying out random sampling test

**take\_one\_out\_test.py:** the script for carrying out the take-one-out cross-validation test

**test\_size\_test.py:** The script for investigating the effect of varying the testing or training dataset size

**save\_model.py:** executing this script to train models using reactions from a single dataset and return the trained models in .sav files

**save\_model2.py:** executing this script to train models using reactions from multiple datasets and return the trained models in .sav files

**evaluation.py:** This script takes the .csv output from the above script to calculate performance metrics by comparing the predictions with the actual labels.

**hyperpara\_test\_v5.py** and **para\_df.csv:** the script and csv file for conducting hyperparameter tuning

The following files under TwoBondChem/ provide an example of the training and evaluation procedure:

**random\_sample\_test\_EXAMPLE.py:** training and testing for 2-bond+ models trained from the [3+2] cycloaddition dataset. The code is taken from 'random\_sample\_test.py' under model\_evaluation/ folder. This script can be executed as it is from the TwoBondChem/ folder

**cyclo\_2b+/** contains output files from executing the 'random\_sample\_test\_EXAMPLE.py' script

**evaluate\_EXAMPLE.ipynb:** evaluation of the predictions using the 'evaluation.py' under model\_evaluation/ folder

### 1.3 Atom-to-Atom Mapping

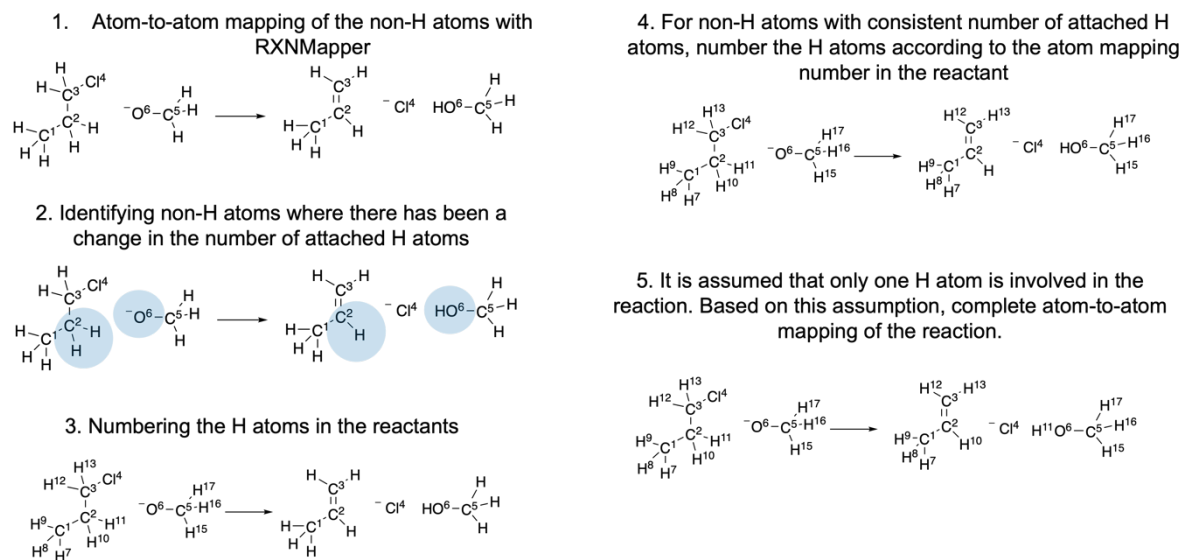

**Figure S4.** Atom-to-atom mapping procedures for the first-year and Diels-Alder reaction dataset

## 2. Bond strength descriptors

The bond strength component involves categorising the bonds to which the atom is connected into one of the 86 bond classes across 12 bond types (*ie* CC, CN, CH, CCl, CO, CS, CF, NO, HN, HO and OP). The complete list of bond classes is in SI Table S3. The classification of the 86 bond classes was established using the method employed in the MoLE8 machine-learned potential energy surface model.<sup>6</sup> The classification of bonds is based on the bond length of the specific bond type. The parametrisation procedure was repeated and the bond length distributions of each bond type on MMFF-optimised structures were studied using a dataset of 100,000 molecules from ChEMBL-28.<sup>7</sup> Kernel density estimations (KDE) were applied to the histogram of the bond length distribution (SI Figure S5). The minima observed on the KDE curve were identified as the boundaries dividing each bond class.

The bond strength descriptors explicitly provide information on the chemical environment of the atom beyond the two-bond range. The bond strength descriptors can distinguish between the same bond (*ie* the same bond type and bond order) but located in different chemical environments due to subtle bond length differences. For example, the single C-C bond within a conjugated system and in a saturated chain have slightly different bond lengths and are categorised into two bond strength classes (SI Figure S6).

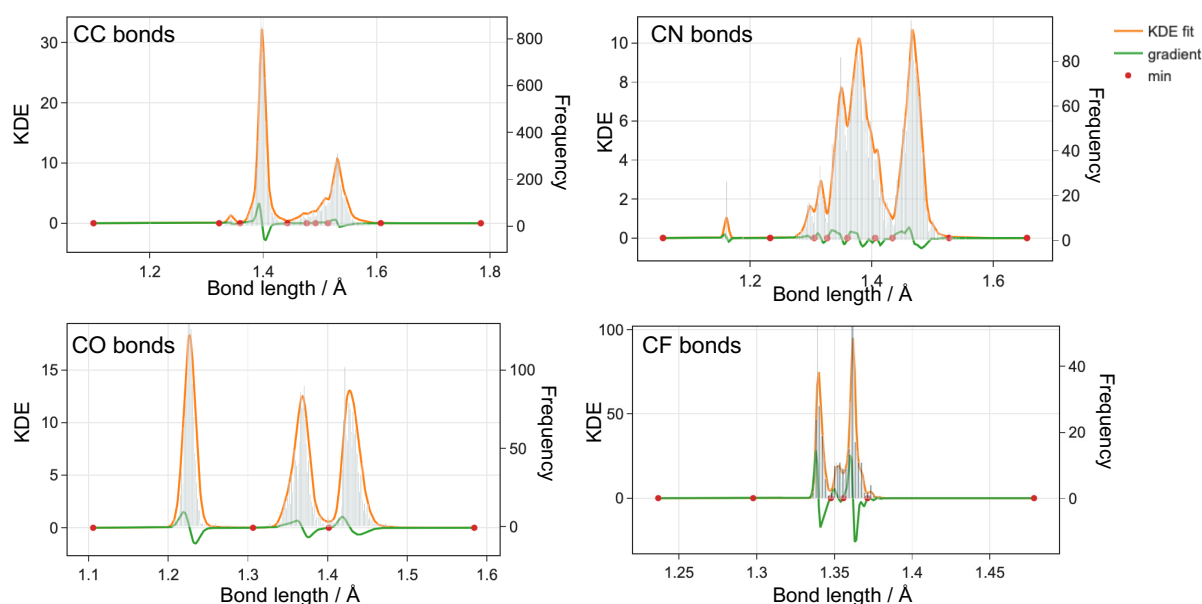

**Figure S5.** Derivation of the bond strength classes from bond length distribution histograms. The corresponding plot for CC, CN, CO and CF are given above as examples.<sup>6,7</sup>

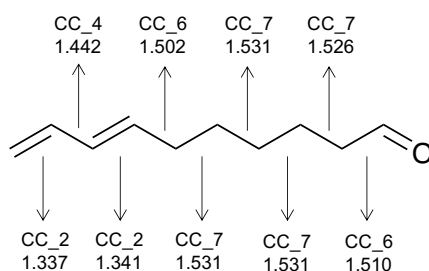

**Figure S6.** Bond strength class and bond length in Å for all the CC bonds in an example molecule.

**Table S3.** Classification of the bond strength class based on the bond length: bond classes and the associated parameters under each bond type.

| Bond Type | Bond strength classes<br>{'bond class name':[minimum length in Å, maximum length in Å]}                                                                                                                                                                    |
|-----------|------------------------------------------------------------------------------------------------------------------------------------------------------------------------------------------------------------------------------------------------------------|
| CC        | {'CC_0': [0, 1.1007], 'CC_1': [1.1007, 1.3593], 'CC_2': [1.3593, 1.4769], 'CC_3': [1.4769, 1.3223], 'CC_4': [1.3223, 1.4429], 'CC_5': [1.4429, 1.4924], 'CC_6': [1.4924, 1.5144], 'CC_7': [1.5144, 1.6075], 'CC_8': [1.6075, 1.784], 'CC_9': [1.784, 3]}   |
| CN        | {'CN_0': [0, 1.0569], 'CN_1': [1.0569, 1.3056], 'CN_2': [1.3056, 1.3271], 'CN_3': [1.3271, 1.3602], 'CN_4': [1.3602, 1.233], 'CN_5': [1.233, 1.4057], 'CN_6': [1.4057, 1.4342], 'CN_7': [1.4342, 1.5273], 'CN_8': [1.5273, 1.6554], 'CN_9': [1.6554, 3]}   |
| CH        | {'CH_0': [0, 0.9363], 'CH_1': [0.9363, 1.0756], 'CH_2': [1.0756, 1.1072], 'CH_3': [1.1072, 1.2415], 'CH_4': [1.2415, 1.0912], 'CH_5': [1.0912, 3]}                                                                                                         |
| CCI       | {'CCI_0': [0, 1.5942], 'CCI_1': [1.5942, 1.7386], 'CCI_2': [1.7386, 1.7251], 'CCI_3': [1.7251, 1.713], 'CCI_4': [1.713, 1.8929], 'CCI_5': [1.8929, 3]}                                                                                                     |
| CO        | {'CO_0': [0, 1.1058], 'CO_1': [1.1058, 1.5842], 'CO_2': [1.5842, 1.3065], 'CO_3': [1.3065, 1.4016], 'CO_4': [1.4016, 3]}                                                                                                                                   |
| HN        | {'HN_0': [0, 0.8936], 'HN_1': [0.8936, 1.0002], 'HN_2': [1.0002, 1.0173], 'HN_3': [1.0173, 1.0113], 'HN_4': [1.0113, 1.0108], 'HN_5': [1.0108, 1.0243], 'HN_6': [1.0243, 1.0248], 'HN_7': [1.0248, 1.0293], 'HN_8': [1.0293, 1.1665], 'HN_9': [1.1665, 3]} |
| CS        | {'CS_0': [0, 1.5101], 'CS_1': [1.5101, 1.7539], 'CS_2': [1.7539, 1.6793], 'CS_3': [1.6793, 1.7428], 'CS_4': [1.7428, 1.6302], 'CS_5': [1.6302, 1.8009], 'CS_6': [1.8009, 1.875], 'CS_7': [1.875, 1.9866], 'CS_8': [1.9866, 3]}                             |
| OS        | {'OS_0': [0, 1.3371], 'OS_1': [1.3371, 1.7609], 'OS_2': [1.7609, 1.4747], 'OS_3': [1.4747, 3]}                                                                                                                                                             |
| CF        | {'CF_0': [0, 1.3558], 'CF_1': [1.3558, 1.2366], 'CF_2': [1.2366, 1.3477], 'CF_3': [1.3477, 1.3713], 'CF_4': [1.3713, 1.2977], 'CF_5': [1.2977, 1.4784], 'CF_6': [1.4784, 3]}                                                                               |
| NO        | {'NO_0': [0, 1.1352], 'NO_1': [1.1352, 1.4542], 'NO_2': [1.4542, 1.5734], 'NO_3': [1.5734, 1.3306], 'NO_4': [1.3306, 3]}                                                                                                                                   |
| HO        | {'HO_0': [0, 0.8564], 'HO_1': [0.8564, 0.9611], 'HO_2': [0.9611, 0.9747], 'HO_3': [0.9747, 0.9752], 'HO_4': [0.9752, 0.9777], 'HO_5': [0.9777, 0.9792], 'HO_6': [0.9792, 0.9797], 'HO_7': [0.9797, 0.9872], 'HO_8': [0.9872, 1.1189], 'HO_9': [1.1189, 3]} |
| OP        | {'OP_0': [0, 1.3884], 'OP_1': [1.3884, 1.7245], 'OP_2': [1.7245, 1.5467], 'OP_3': [1.5467, 3]}                                                                                                                                                             |

## Understand bond strength descriptors

Model evaluation with the Diels-Alder reaction dataset: Train: 100, Test: 100

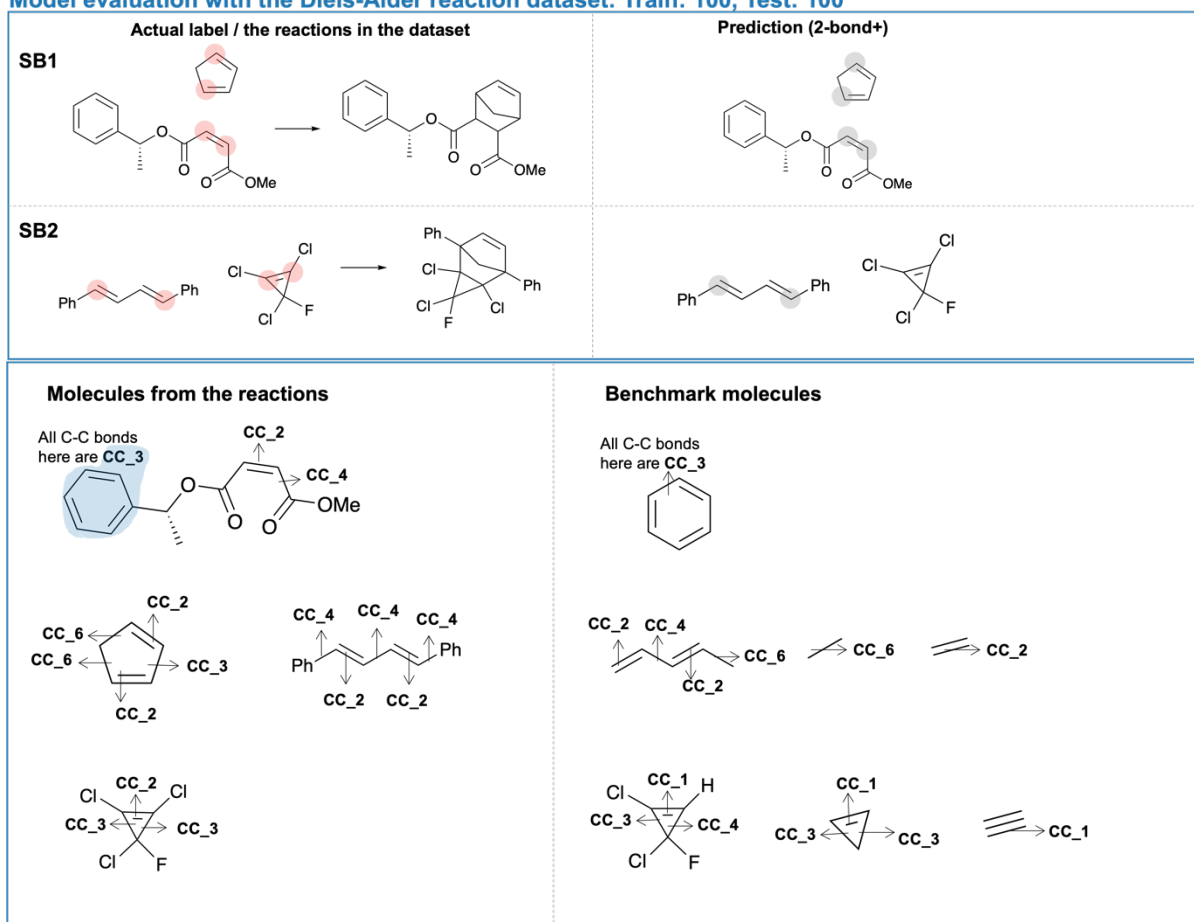

**Figure S7.** Additional case studies on model trained with Diels-Alder reaction data to understand bond strength descriptors.

The bond strength descriptor classification depends on the bond length measurements on the force field structure. In frequently appeared chemical motifs, the classifications should match our chemical intuition better. For example, single, aromatic, double and triple C-C bonds typically have the bond strength descriptor of CC\_6, CC\_3, CC\_2 and CC\_1, respectively. For the less common chemical motif, the classification tends to be harder to interpret and might be against our intuition. For example, the three C-C bonds within a cyclopropane are classified as CC\_3, CC\_3 and CC\_1, respectively. Inevitably, this would impact the performance of the model. In the above study, the model trained on Diels-Alder reactions could not identify the cyclopropane motif as a potential dienophile.

### 3. Model Evaluation

Algorithm Benchmarking:

**Table S4.** Performance on benchmarking with different machine learning algorithms: random forest (RF), K-nearest neighbour (KNN), support vector (SVC), gaussian process (Gaussian) and multi-layer perceptron classifier (NN). The number of sets of reactions involved in training and testing are specified below in bracket. The '2-bond +' descriptor composition was used. The sets of reactions for training and testing are indicated in the brackets.

| Model                                                             | Accuracy | Precision | Recall |
|-------------------------------------------------------------------|----------|-----------|--------|
| Train: year 1 A (78), Test: year 1 B (30)                         |          |           |        |
| RF                                                                | 92.0%    | 86.9%     | 70.5%  |
| KNeigh                                                            | 89.5%    | 80.4%     | 62.1%  |
| SVC                                                               | 86.5%    | 73.3%     | 50.0%  |
| Gaussian                                                          | 91.1%    | 86.9%     | 65.2%  |
| NN                                                                | 91.0%    | 84.6%     | 66.7%  |
| Train: [3+2] cycloaddition (100), Test: [3+2] cycloaddition (100) |          |           |        |
| RF                                                                | 100.0%   | 99.8%     | 100.0% |
| KNeigh                                                            | 99.1%    | 99.8%     | 94.4%  |
| SVC                                                               | 97.7%    | 100.0%    | 85.2%  |
| Gaussian                                                          | 99.4%    | 99.8%     | 96.5%  |
| NN                                                                | 99.9%    | 99.8%     | 99.3%  |
| Train: RGD1 (300), Test: RGD1 (100)                               |          |           |        |
| model                                                             | accuracy | precision | recall |
| RF                                                                | 81.4%    | 76.4%     | 60.7%  |
| KNeigh                                                            | 80.6%    | 74.9%     | 59.2%  |
| SVC                                                               | 78.9%    | 74.3%     | 52.3%  |
| Gaussian                                                          | 81.3%    | 78.0%     | 58.0%  |
| NN                                                                | 81.1%    | 76.8%     | 58.8%  |

Take-one-out cross-validations procedures:

1. A set of reactions was taken out for testing and evaluation. The model training was carried out on the rest of the dataset. The '2-bond +' descriptor composition was used. The training is performed with random forest classifier.
2. Predictions were made and recorded on atoms in the set of reactions outside of the training set.
3. The above steps were repeated for all sets of reactions in the dataset.

The unit for training and testing data is 'set', *ie* a set of competitive reactions with the same reactants. The specific datasets and number of sets of reactions involved are specified in the tables below.

**Table S5A:** Results of the take-one-out cross-validation test. Predictions from the models were treated collectively to calculate the metrics below.

| Dataset<br>(no. of sets of reactions) | % by atoms |           |        | % sets of reactants with: |                                   |                                        |
|---------------------------------------|------------|-----------|--------|---------------------------|-----------------------------------|----------------------------------------|
|                                       | Accuracy   | Precision | Recall | No fault predictions      | No more than one fault prediction | All reactive atoms predicted correctly |
| First-year (107)                      | 89.8%      | 80.6%     | 63.9%  | 24.3%                     | 39.3%                             | 41.1%                                  |
| [3+2]-cycloaddition (100)             | 99.9%      | 99.5%     | 99.5%  | 96.0%                     | 100.0%                            | 98.0%                                  |
| Diels-Alder (100)                     | 97.3%      | 90.6%     | 82.4%  | 47.0%                     | 76.0%                             | 63.0%                                  |
| Diels-Alder (100)*                    | 98.5%      | 92.2%     | 91.6%  | 58.0%                     | 85.0%                             | 72.0%                                  |
| RGD1 (100)                            | 82.1%      | 74.3%     | 67.8%  | 7.0%                      | 29.0%                             | 28.0%                                  |
| Green (100)                           | 83.8%      | 83.9%     | 80.4%  | 27.0%                     | 49.0%                             | 50.0%                                  |

\*After correcting the atom-to-atom mapping errors

**Table S5B:** Results of the take-one-out cross-validation test. The predictions for each set of reactions were treated individually to compute performance metrics, followed by calculating the mean and standard deviation for the entire dataset. As each set of results from testing only involve less than 50 atoms, the standard deviation is expected to be large.

| Dataset<br>(no. of sets of reactions) | % by atoms |            |            |
|---------------------------------------|------------|------------|------------|
|                                       | Accuracy   | Precision  | Recall     |
| First-year (107)                      | 89.8±10.3% | 72.4±27.2% | 83.1±22.4% |
| [3+2]-cycloaddition (100)             | 99.8±0.7%  | 99.5±3.5%  | 99.7±2.4%  |
| Diels-Alder (100)                     | 97.1±4.9%  | 86.3±20.8% | 92.7±13.9% |
| Diels-Alder (100)*                    | 98.5±2.3%  | 91.6±15.3% | 94.3±12.3% |
| RGD1 (100)                            | 81.8±12.1% | 70.5±25.7% | 72.7±24.4% |
| Green (100)                           | 83.6±15.1% | 82.9±20.4% | 86.3±17.8% |

\*After correcting the atom-to-atom mapping errors



Increasing the size of the training data:

**Table S6:** Model performance when varying the size of the training data. The RGD1 dataset was used for conducting this investigation. The '2-bond +' descriptor composition was used. The unit for training and testing data is 'set', *ie* a set of competitive reactions with the same reactants. The same set of data, 100 sets of RGD1 reactions (*ie* 100 reactions in total), was used for testing.

| No. of sets of reactions in training | % by atoms |           |        | % sets of reactants with: |                                   |                                        |
|--------------------------------------|------------|-----------|--------|---------------------------|-----------------------------------|----------------------------------------|
|                                      | Accuracy   | Precision | Recall | No fault predictions      | No more than one fault prediction | All reactive atoms predicted correctly |
| 100                                  | 76.3%      | 63.1%     | 63.0%  | 6.0%                      | 14.0%                             | 28.0%                                  |
| 300                                  | 81.2%      | 76.4%     | 59.9%  | 8.0%                      | 30.0%                             | 24.0%                                  |
| 600                                  | 81.7%      | 75.8%     | 62.8%  | 6.0%                      | 27.0%                             | 25.0%                                  |
| 900                                  | 82.6%      | 78.8%     | 62.4%  | 12.0%                     | 35.0%                             | 27.0%                                  |
| 3000                                 | 83.2%      | 79.6%     | 63.9%  | 16.0%                     | 38.0%                             | 25.0%                                  |
| 6000                                 | 84.9%      | 84.5%     | 64.7%  | 14.0%                     | 47.0%                             | 26.0%                                  |
| 10300                                | 84.3%      | 83.5%     | 63.5%  | 15.0%                     | 43.0%                             | 28.0%                                  |

## Combining the datasets:

**Table S7:** Performance of '2-bond +' models trained from the combined dataset. The specific datasets and number of sets of reactions involved are specified below in a consistent format. Let us take the first model presented below, 'Train: 50 (104) [3+2] cycloaddition + 50 (50) Diels-Alder', as an example. 50 sets of [3+2] cycloaddition reactions with the same reactants (*ie* equivalent to 104 reactions) and 50 sets of Diels-Alder reactions with the same reactants (*ie* equivalent to 50 reactions) are involved in training. In total, there are 154 reactions in the training dataset. Other than the overall results, the performance breakdown by the reactions from different datasets in the testing dataset is also given below.

| Testing dataset                                                                                                                                                                                                                                    | % by atoms |           |        | % sets of reactants with: |                                   |                                        |
|----------------------------------------------------------------------------------------------------------------------------------------------------------------------------------------------------------------------------------------------------|------------|-----------|--------|---------------------------|-----------------------------------|----------------------------------------|
|                                                                                                                                                                                                                                                    | Accuracy   | Precision | Recall | No fault predictions      | No more than one fault prediction | All reactive atoms predicted correctly |
| <b>Type B</b>                                                                                                                                                                                                                                      |            |           |        |                           |                                   |                                        |
| Train: 50 (104) [3+2] cycloaddition + 50 (50) Diels-Alder,<br>Test: 50 (101) [3+2] cycloaddition + 50 (50) Diels-Alder                                                                                                                             |            |           |        |                           |                                   |                                        |
| Overall                                                                                                                                                                                                                                            | 97.6%      | 91.1%     | 89.7%  | 58.0%                     | 85.0%                             | 75.0%                                  |
| [3+2] cycloaddition                                                                                                                                                                                                                                | 99.2%      | 100.0%    | 95.3%  | 80.0%                     | 100.0%                            | 80.0%                                  |
| Diels-Alder                                                                                                                                                                                                                                        | 96.5%      | 83.5%     | 84.6%  | 36.0%                     | 70.0%                             | 70.0%                                  |
| Train: 100 (205) [3+2] cycloaddition + 100 (100) Diels-Alder,<br>Test: 100 (219) [3+2] cycloaddition + 100 (100) Diels-Alder                                                                                                                       |            |           |        |                           |                                   |                                        |
| Overall                                                                                                                                                                                                                                            | 98.2%      | 94.1%     | 91.3%  | 68.0%                     | 88.0%                             | 80.5%                                  |
| [3+2] cycloaddition                                                                                                                                                                                                                                | 99.5%      | 99.8%     | 97.2%  | 88.0%                     | 99.0%                             | 89.0%                                  |
| Diels-Alder                                                                                                                                                                                                                                        | 97.4%      | 88.6%     | 85.7%  | 48.0%                     | 77.0%                             | 72.0%                                  |
| <b>Type C</b>                                                                                                                                                                                                                                      |            |           |        |                           |                                   |                                        |
| Type C: Train: 50 (53) RGD1 + 50 (59) Green,<br>Test: 50 (57) RGD1 + 50 (61) Green                                                                                                                                                                 |            |           |        |                           |                                   |                                        |
| Overall                                                                                                                                                                                                                                            | 80.3%      | 76.6%     | 69.8%  | 11.0%                     | 31.0%                             | 36.0%                                  |
| RGD1                                                                                                                                                                                                                                               | 79.3%      | 73.0%     | 62.3%  | 4.0%                      | 18.0%                             | 22.0%                                  |
| Green                                                                                                                                                                                                                                              | 81.9%      | 80.1%     | 78.1%  | 18.0%                     | 44.0%                             | 50.0%                                  |
| Train: 100 (107) RGD1 + 100 (126) Green,<br>Test: 100 (110) RGD1 + 100 (120) Green                                                                                                                                                                 |            |           |        |                           |                                   |                                        |
| Overall                                                                                                                                                                                                                                            | 79.8%      | 76.5%     | 67.3%  | 20.0%                     | 35.0%                             | 39.0%                                  |
| RGD1                                                                                                                                                                                                                                               | 77.7%      | 66.0%     | 62.6%  | 7.0%                      | 20.0%                             | 31.0%                                  |
| Green                                                                                                                                                                                                                                              | 82.8%      | 88.7%     | 72.0%  | 33.0%                     | 50.0%                             | 47.0%                                  |
| <b>Combining all datasets: the global model</b>                                                                                                                                                                                                    |            |           |        |                           |                                   |                                        |
| Train:<br>77(105) first-year + 100 (205) [3+2] cycloaddition + 100 (100) Diels-Alder + 100 (107) RGD1 + 100 (126) Green,<br>Test:<br>30 (41) first-year + 100 (219) [3+2] cycloaddition + 100 (100) Diels-Alder + 100 (110) RGD1 + 100 (120) Green |            |           |        |                           |                                   |                                        |
| Overall                                                                                                                                                                                                                                            | 92.5%      | 81.1%     | 75.7%  | 35.3%                     | 50.7%                             | 54.2%                                  |
| First-year                                                                                                                                                                                                                                         | 91.3%      | 83.0%     | 68.8%  | 33.3%                     | 56.7%                             | 53.3%                                  |
| [3+2] cycloaddition                                                                                                                                                                                                                                | 99.1%      | 96.8%     | 96.6%  | 80.0%                     | 94.0%                             | 87.0%                                  |
| Diels-Alder                                                                                                                                                                                                                                        | 96.1%      | 78.8%     | 83.3%  | 38.0%                     | 54.0%                             | 65.0%                                  |
| RGD1                                                                                                                                                                                                                                               | 77.6%      | 68.2%     | 59.0%  | 6.0%                      | 19.0%                             | 27.0%                                  |
| Green                                                                                                                                                                                                                                              | 82.5%      | 81.1%     | 70.1%  | 18.0%                     | 34.0%                             | 38.0%                                  |

## Hyperparameter tuning

**Table S8.** Performance on benchmarking with different hyperparameter setting for the RF model. The hyperparameter tuning test was conducted on three different datasets: first-year, [3+2] cycloaddition and RGD1. In the hyperparameter tuning using the first-year dataset, the split of the training and testing dataset is as presented in SI Figure S8. 78 sets of reactions were chosen for training and the rest for testing. For the hyperparameter tuning using the [3+2] cycloaddition and RGD1 dataset, the first 100 sets of reactions were used for training and the sequential 100 sets of reactions were used for testing. The results with the default hyperparameter setting from the scikit-learn package are highlighted in yellow.

| Parameter                                                         | Accuracy     | Precision    | Recall       |
|-------------------------------------------------------------------|--------------|--------------|--------------|
| <b>max_features, criterion, n_estimators</b>                      |              |              |              |
| Train: first-year (78), Test: first-year (30)                     |              |              |              |
| entropy, log2, 100                                                | 92.5%        | 71.9%        | 86.8%        |
| entropy, log2, 200                                                | 93.2%        | 73.4%        | 89.5%        |
| entropy, log2, 20                                                 | 92.8%        | 75.0%        | 85.7%        |
| entropy, log2, 50                                                 | 92.6%        | 71.9%        | 87.6%        |
| entropy, log2, 75                                                 | 93.8%        | 76.6%        | 89.9%        |
| entropy, sqrt, 100                                                | 93.4%        | 75.0%        | 88.9%        |
| entropy, sqrt, 200                                                | 92.9%        | 73.4%        | 87.9%        |
| entropy, sqrt, 20                                                 | 92.8%        | 70.3%        | 90.0%        |
| entropy, sqrt, 50                                                 | 93.1%        | 73.4%        | 88.7%        |
| entropy, sqrt, 75                                                 | 93.2%        | 75.0%        | 88.1%        |
| gini, log2, 100                                                   | 93.7%        | 75.0%        | 90.6%        |
| gini, log2, 200                                                   | 93.1%        | 72.7%        | 89.4%        |
| gini, log2, 20                                                    | 92.0%        | 72.7%        | 83.8%        |
| gini, log2, 50                                                    | 92.9%        | 75.0%        | 86.5%        |
| gini, log2, 75                                                    | 93.2%        | 75.8%        | 87.4%        |
| <b>gini, sqrt, 100</b>                                            | <b>93.4%</b> | <b>75.0%</b> | <b>88.9%</b> |
| gini, sqrt, 200                                                   | 93.7%        | 74.2%        | 91.4%        |
| gini, sqrt, 20                                                    | 92.6%        | 71.9%        | 87.6%        |
| gini, sqrt, 50                                                    | 93.2%        | 73.4%        | 89.5%        |
| gini, sqrt, 75                                                    | 93.4%        | 75.8%        | 88.2%        |
| Train: [3+2] cycloaddition (100), Test: [3+2] cycloaddition (100) |              |              |              |
| entropy, log2, 100                                                | 99.9%        | 99.3%        | 99.8%        |
| entropy, log2, 200                                                | 99.9%        | 99.8%        | 99.8%        |
| entropy, log2, 20                                                 | 99.7%        | 98.2%        | 99.8%        |
| entropy, log2, 50                                                 | 99.8%        | 99.1%        | 99.8%        |
| entropy, log2, 75                                                 | 99.9%        | 100.0%       | 99.1%        |
| entropy, sqrt, 100                                                | 100.0%       | 100.0%       | 99.8%        |
| entropy, sqrt, 200                                                | 99.9%        | 100.0%       | 99.1%        |
| entropy, sqrt, 20                                                 | 99.8%        | 99.3%        | 99.1%        |
| entropy, sqrt, 50                                                 | 100.0%       | 100.0%       | 99.8%        |
| entropy, sqrt, 75                                                 | 100.0%       | 100.0%       | 99.8%        |
| gini, log2, 100                                                   | 100.0%       | 100.0%       | 99.8%        |
| gini, log2, 200                                                   | 100.0%       | 100.0%       | 99.8%        |

|                                     |               |               |              |
|-------------------------------------|---------------|---------------|--------------|
| gini, log2, 20                      | 99.6%         | 97.7%         | 99.8%        |
| gini, log2, 50                      | 99.9%         | 100.0%        | 99.1%        |
| gini, log2, 75                      | 99.9%         | 99.5%         | 99.8%        |
| <b>gini, sqrt, 100</b>              | <b>100.0%</b> | <b>100.0%</b> | <b>99.8%</b> |
| gini, sqrt, 200                     | 99.9%         | 99.8%         | 99.8%        |
| gini, sqrt, 20                      | 99.9%         | 99.3%         | 99.8%        |
| gini, sqrt, 50                      | 99.9%         | 99.8%         | 99.8%        |
| gini, sqrt, 75                      | 100.0%        | 100.0%        | 99.8%        |
| Train: RGD1 (100), Test: RGD1 (100) |               |               |              |
| entropy, log2, 100                  | 76.8%         | 65.7%         | 63.4%        |
| entropy, log2, 200                  | 77.0%         | 63.6%         | 64.3%        |
| entropy, log2, 20                   | 77.6%         | 63.6%         | 65.4%        |
| entropy, log2, 50                   | 76.3%         | 61.6%         | 63.3%        |
| entropy, log2, 75                   | 77.6%         | 65.3%         | 64.9%        |
| entropy, sqrt, 100                  | 76.9%         | 64.1%         | 64.0%        |
| entropy, sqrt, 200                  | 76.6%         | 63.6%         | 63.6%        |
| entropy, sqrt, 20                   | 77.2%         | 60.5%         | 65.6%        |
| entropy, sqrt, 50                   | 76.7%         | 63.4%         | 63.7%        |
| entropy, sqrt, 75                   | 77.0%         | 63.0%         | 64.5%        |
| gini, log2, 100                     | 76.1%         | 62.0%         | 62.9%        |
| gini, log2, 200                     | 76.2%         | 62.2%         | 63.1%        |
| gini, log2, 20                      | 77.2%         | 63.9%         | 64.6%        |
| gini, log2, 50                      | 76.5%         | 61.5%         | 63.9%        |
| gini, log2, 75                      | 76.0%         | 60.7%         | 63.0%        |
| <b>gini, sqrt, 100</b>              | <b>76.1%</b>  | <b>61.1%</b>  | <b>63.1%</b> |
| gini, sqrt, 200                     | 76.6%         | 63.2%         | 63.7%        |
| gini, sqrt, 20                      | 76.3%         | 60.3%         | 63.7%        |
| gini, sqrt, 50                      | 76.8%         | 63.9%         | 63.7%        |
| gini, sqrt, 75                      | 77.6%         | 66.8%         | 64.5%        |

The random sampling test procedure for results in Table S9 and S10:

The following procedures were conducted on each dataset individually:

1. 100 sets of reactions with the same reactants were randomly selected for training and testing, respectively.
2. Model training was performed using the 'two-bond +' descriptor composition. The metrics from the evaluation were recorded after the testing.
3. The above steps were repeated five times. The mean and standard deviation of the performance metrics were calculated.

The effect of increasing the test data size:

**Table S9:** Investigating the effect of increasing the test data size: The mean and standard deviation of the performance metrics were calculated based on the results of random sampling tests.

| Test data size             | % by atoms |           |           | % sets of reactants with: |                                   |                                        |
|----------------------------|------------|-----------|-----------|---------------------------|-----------------------------------|----------------------------------------|
|                            | Accuracy   | Precision | Recall    | No fault predictions      | No more than one fault prediction | All reactive atoms predicted correctly |
| <b>[3+2] cycloaddition</b> |            |           |           |                           |                                   |                                        |
| 100                        | 99.7±0.2%  | 97.2±1.5% | 99.2±1.0% | 87.4±6.3%                 | 98.0±1.8%                         | 89.2±5.0%                              |
| 200                        | 98.8±0.5%  | 92.1±4.3% | 96.1±4.1% | 64.9±11.7%                | 84.4±9.1%                         | 74.0±11.2%                             |
| 500                        | 98.7±0.4%  | 93.0±2.8% | 94.9±2.0% | 64.2±6.8%                 | 85.1±9.0%                         | 73.2±9.4%                              |
| 1000                       | 98.1±0.2%  | 88.6±1.5% | 93.2±2.1% | 55.6±3.6%                 | 72.5±3.2%                         | 63.7±2.4%                              |
| 1500                       | 97.9±0.4%  | 89.6±2.5% | 91.7±5.1% | 53.4±7.4%                 | 69.1±8.2%                         | 67.0±4.3%                              |
| 2000                       | 97.7±0.4%  | 88.0±2.7% | 90.6±3.3% | 52.5±4.8%                 | 64.6±6.8%                         | 64.6±3.3%                              |
| <b>Diels-Alder</b>         |            |           |           |                           |                                   |                                        |
| 100                        | 96.1±0.7%  | 72.2±4.9% | 90.0±1.8% | 42.8±3.5%                 | 64.0±2.4%                         | 54.4±1.9%                              |
| 200                        | 96.6±0.3%  | 75.9±2.8% | 90.0±1.4% | 41.4±4.6%                 | 66.2±3.1%                         | 56.5±8.6%                              |
| 500                        | 96.3±0.2%  | 74.1±1.3% | 89.7±0.6% | 43.7±1.9%                 | 65.5±1.6%                         | 60.8±5.4%                              |
| 1000                       | 96.3±0.3%  | 73.1±2.1% | 90.8±1.1% | 43.3±4.2%                 | 65.1±3.6%                         | 57.2±5.4%                              |
| 1500                       | 96.3±0.2%  | 73.8±0.7% | 89.9±1.4% | 43.2±2.5%                 | 65.8±2.0%                         | 58.2±1.2%                              |
| 2000                       | 96.4±0.1%  | 74.6±1.1% | 89.4±0.2% | 43.6±2.4%                 | 65.6±0.3%                         | 60.4±2.4%                              |
| <b>RGD1</b>                |            |           |           |                           |                                   |                                        |
| 100                        | 79.2±2.0%  | 58.1±5.7% | 68.0±1.7% | 6.6±1.2%                  | 21.6±4.3%                         | 28.8±5.9%                              |
| 200                        | 78.0±0.5%  | 55.8±2.2% | 66.8±2.3% | 4.6±1.4%                  | 18.6±1.4%                         | 23.7±3.3%                              |
| 500                        | 78.0±0.6%  | 57.6±2.4% | 65.8±1.6% | 5.5±0.4%                  | 17.0±1.5%                         | 23.4±1.3%                              |
| 1000                       | 78.0±0.9%  | 60.3±3.8% | 64.8±1.5% | 4.7±0.3%                  | 17.9±1.5%                         | 27.1±2.4%                              |
| 1500                       | 78.2±0.6%  | 60.3±2.5% | 65.1±2.0% | 4.7±1.0%                  | 17.9±1.6%                         | 28.3±1.7%                              |
| 2000                       | 77.7±0.6%  | 58.4±1.7% | 64.8±1.3% | 4.5±0.7%                  | 17.2±1.4%                         | 27.0±3.6%                              |

## The effect of changing the activation energy (EA) cut-off:

**Table S10:** Investigating the effect of changing the activation energy (EA) cut-off: The mean and standard deviation of the performance metrics were calculated based on the results of random sampling tests.

| EA cut-off<br>(kcal mol <sup>-1</sup> ) | % by atoms |           |           | % sets of reactants with: |                                   |                                        |
|-----------------------------------------|------------|-----------|-----------|---------------------------|-----------------------------------|----------------------------------------|
|                                         | Accuracy   | Precision | Recall    | No fault predictions      | No more than one fault prediction | All reactive atoms predicted correctly |
| <b>Green</b>                            |            |           |           |                           |                                   |                                        |
| 37                                      | 85.1±0.2%  | 78.0±0.6% | 87.9±0.6% | 27.6±1.5%                 | 49.6±1.0%                         | 41.4±2.2%                              |
| 40                                      | 84.3±0.6%  | 76.8±1.4% | 87.3±0.9% | 27.4±3.5%                 | 47.2±2.6%                         | 43.4±3.3%                              |
| 45                                      | 84.0±0.6%  | 76.4±0.8% | 86.6±0.8% | 22.4±2.5%                 | 46.4±0.5%                         | 39.2±2.6%                              |
| 50                                      | 83.0±1.0%  | 77.5±2.2% | 84.2±2.5% | 19.6±2.5%                 | 43.0±3.3%                         | 44.0±4.2%                              |
| 55                                      | 81.9±0.5%  | 77.2±1.0% | 82.4±1.6% | 19.6±1.9%                 | 38.4±1.7%                         | 44.4±2.7%                              |
| 60                                      | 78.6±1.6%  | 70.7±3.3% | 82.5±0.7% | 15.4±3.2%                 | 31.8±2.4%                         | 33.6±7.4%                              |
| <b>RGD1</b>                             |            |           |           |                           |                                   |                                        |
| 30                                      | 79.5±1.8%  | 50.7±2.3% | 70.8±5.0% | 7.4±3.3%                  | 24.8±6.8%                         | 23.2±5.7%                              |
| 35                                      | 79.1±0.7%  | 57.8±3.2% | 66.7±1.8% | 6.8±2.6%                  | 20.0±1.4%                         | 25.8±4.9%                              |
| 40                                      | 78.5±1.7%  | 57.0±5.8% | 66.3±2.7% | 5.6±1.7%                  | 18.6±2.6%                         | 26.2±9.2%                              |
| 45                                      | 77.6±1.0%  | 55.4±1.9% | 67.2±2.3% | 4.0±1.4%                  | 15.8±2.7%                         | 22.2±2.3%                              |
| 50                                      | 76.6±2.4%  | 55.1±6.6% | 65.3±4.2% | 4.2±1.3%                  | 16.0±6.8%                         | 24.2±6.6%                              |
| 55                                      | 76.8±1.6%  | 56.2±5.5% | 65.7±2.0% | 2.4±1.2%                  | 14.4±2.9%                         | 18.2±3.4%                              |

Using the Eyring equation (eq S1), the rate constant ( $k$ ) and the half-life ( $t_{1/2}$ , eq S2) at the room temperature, 298 K, were calculated (Table S11). It is assumed that the reaction is simple and monomolecular,  $A \rightarrow B$ .  $k_B$ ,  $h$ ,  $R$  and  $T$  are Boltzmann's constant, Planck's constant, ideal gas constant and temperature respectively.

**Table S11.** The rate constant ( $k$ ) and the half-life ( $t_{1/2}$ ) based on the Eyring equation at 298 K

| $\Delta G^\ddagger$<br>(kcal mol <sup>-1</sup> ) | $k$ (s <sup>-1</sup> ) | $t_{1/2}$ (s) |
|--------------------------------------------------|------------------------|---------------|
| 20                                               | 1.33E-02               | 52.01         |
| 30                                               | 6.17E-10               | 1.12E+09      |
| 40                                               | 2.86E-17               | 2.42E+16      |
| 50                                               | 1.32E-24               | 5.23E+23      |

$$k = \frac{k_B T}{h} e^{\frac{-\Delta G^\ddagger}{RT}} \quad (\text{S1})$$

$$t_{1/2} = \ln(2) / k \quad (\text{S2})$$

The above calculation shows that the reaction will take days when the barrier is above 30 kcal mol<sup>-1</sup>. Therefore, our chosen cut-off is sensible for leaving out the less kinetically favourable reactions at room temperature.

**Table S12.** Performance of the models with first-year reactions. ‘Train: 78 (105)’ implies that 78 sets of reactions with the same reactants, equivalent to 105 reactions, were involved in training. ‘Test: 30 (42)’ means 30 sets of reactions with the same reactants, equivalent to 42 reactions, were involved in testing. In total, 147 reactions were involved in the training and testing of the model. This corresponds to 100% of the first-year reaction dataset. For each set of data, ‘one-bond’, ‘two-bond’ and ‘two-bond +’ descriptor compositions were considered.

| Entry                                                                                                     | Descriptors | % by atoms |           |        | % sets of reactants with: |                                   |                                        |
|-----------------------------------------------------------------------------------------------------------|-------------|------------|-----------|--------|---------------------------|-----------------------------------|----------------------------------------|
|                                                                                                           |             | Accuracy   | Precision | Recall | No fault predictions      | No more than one fault prediction | All reactive atoms predicted correctly |
| <b>Type A</b>                                                                                             |             |            |           |        |                           |                                   |                                        |
| <b>First-year reactions: Train: 78 (105), Test: 30 (42) → total 147 reactions, ie 100% of the dataset</b> |             |            |           |        |                           |                                   |                                        |
| 1                                                                                                         | One-bond    | 88.59%     | 73.64%    | 63.28% | 10.0%                     | 56.7%                             | 43.3%                                  |
| 2                                                                                                         | Two-bond    | 91.59%     | 83.96%    | 69.53% | 26.7%                     | 56.7%                             | 56.7%                                  |
| 3                                                                                                         | Two-bonds + | 93.09%     | 87.27%    | 75.00% | 40.0%                     | 70.0%                             | 63.3%                                  |

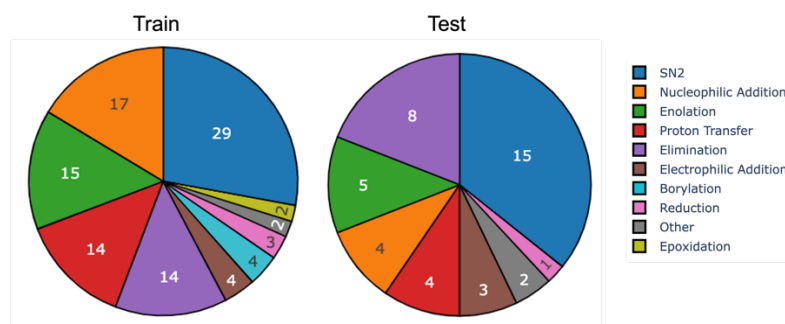

**Figure S8.** Composition of the training and testing first-year dataset in model evaluation for producing results in Table S12

#### 4. Performance on non-elementary reaction examples

##### Tests on reactions from first-year exam questions

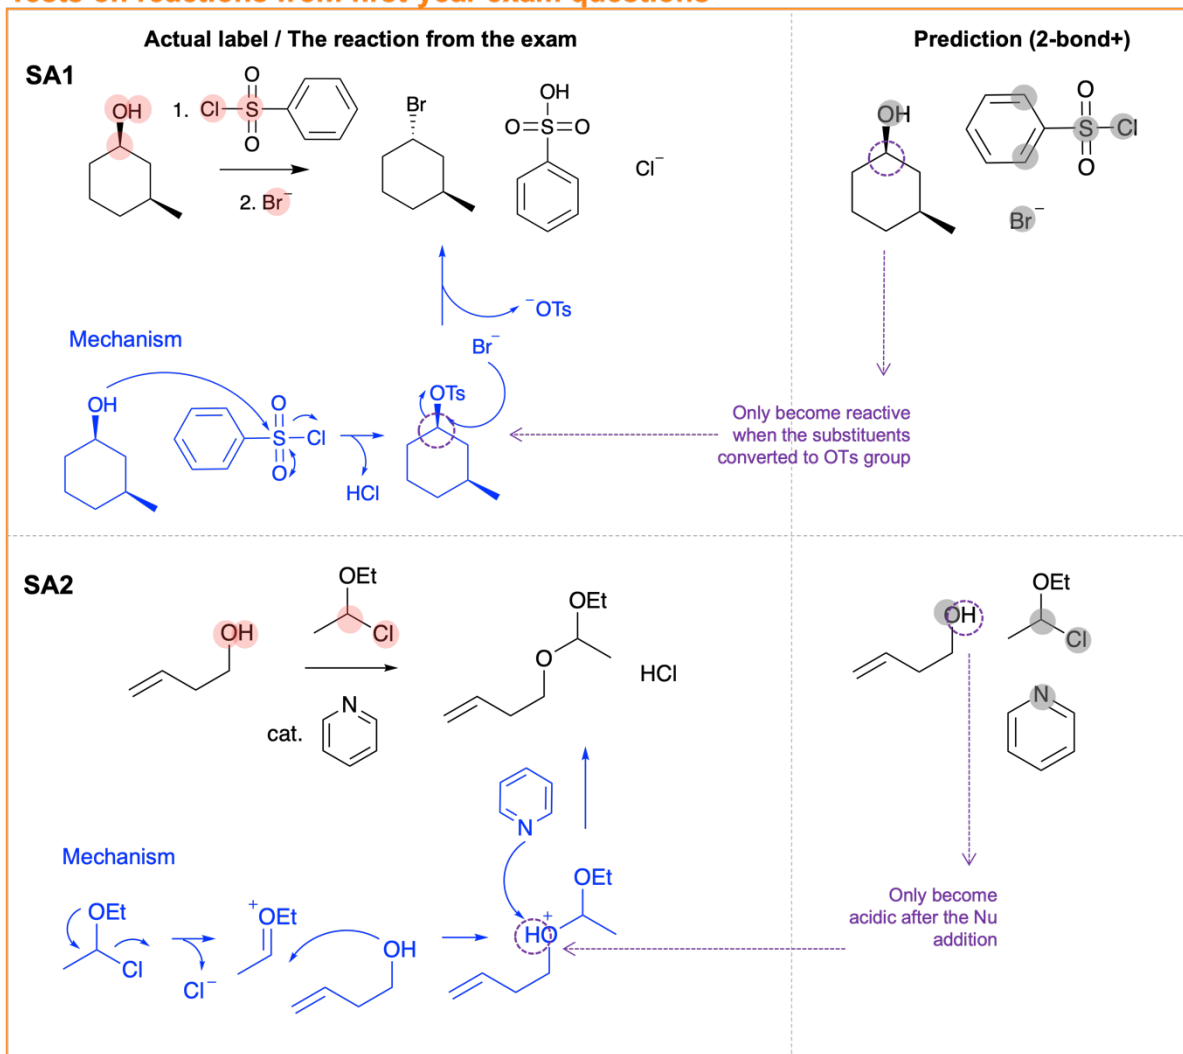

**Figure S9.** Additional examples: Predictions from the ‘two-bond +’ model trained on all first-year reactions using reactions from first-year exams at the University of Cambridge. These reactions are non-elementary.

It is assumed that reactions within the first-year reaction data set are elementary. This categorisation is based on chemical intuition rather than computations. Thus, we expect a few non-elementary reactions within the dataset and a better performance of the models on the elementary reactions compared to non-elementary reactions. In the above cases, the model trained on the first-year reaction dataset cannot pick out atoms that become more reactive in the intermediate than in the reactant.



## 5. Reference

- 1 T. Stuyver, K. Jorner and C. W. Coley, *Sci. Data*, 2023, **10**, 66.
- 2 S. Li, X. Wang, Y. Wu, H. Duan and L. Tang, *RSC Adv.*, 2022, **12**, 33801–33807.
- 3 Q. Zhao, S. M. Vaddadi, M. Woulfe, L. A. Ogunfowora, S. S. Garimella, O. Isayev and B. M. Savoie, *Sci. Data*, 2023, **10**, 145.
- 4 C. A. Grambow, L. Pattanaik and W. H. Green, *Sci. Data*, 2020, **7**, 137.
- 5 P. Schwaller, B. Hoover, J.-L. L. Reymond, H. Strobelt and T. Laino, *Sci. Adv.*, 2023, **7**, eabe4166.
- 6 S. Lee, K. Ermanis and J. M. Goodman, *Chem. Sci.*, 2022, **13**, 7204–7214.
- 7 F. Berenger and K. Tsuda, *J. Cheminform.*, 2021, **13**, 88.
